# Supplementary material for: Clinical syndromes linked to biallelic germline variants in MCM8 and MCM9
Source: bioRxiv or medRxiv preprint supplement (doi:10.1101/2024.10.30.24315828), 2024-11-04
Supplement: Supplementary file [file media-5.pdf]

**A. MCM8**

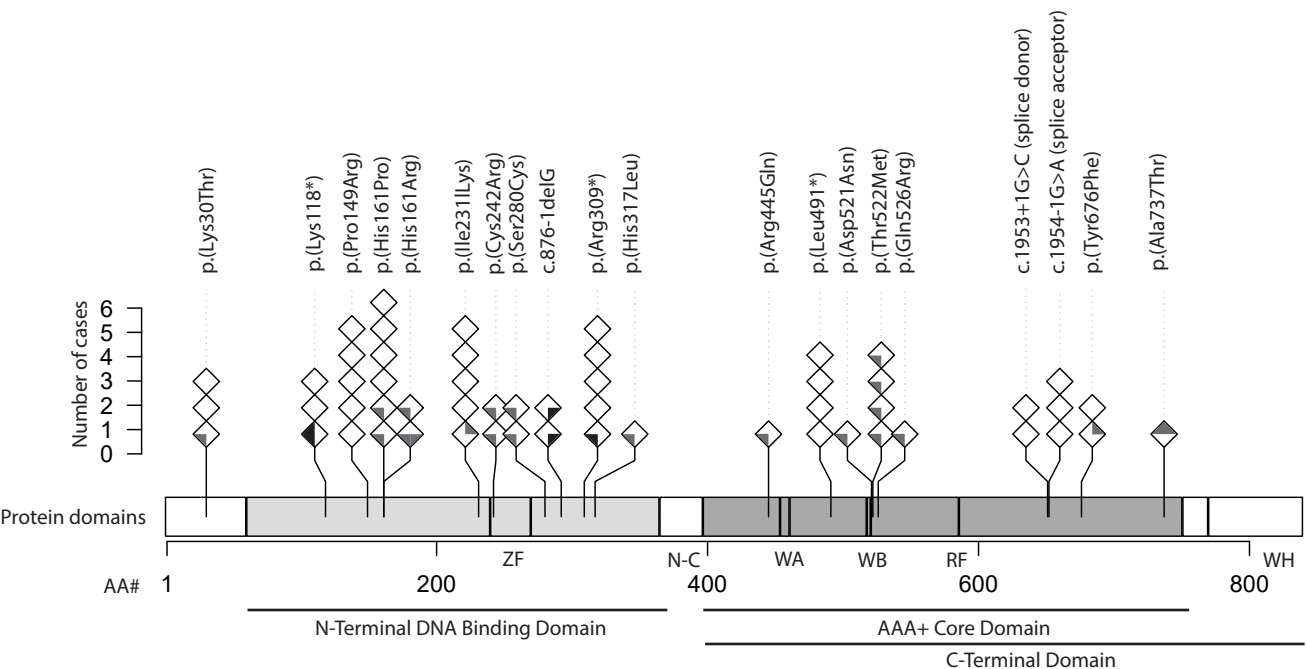

**B. MCM9**

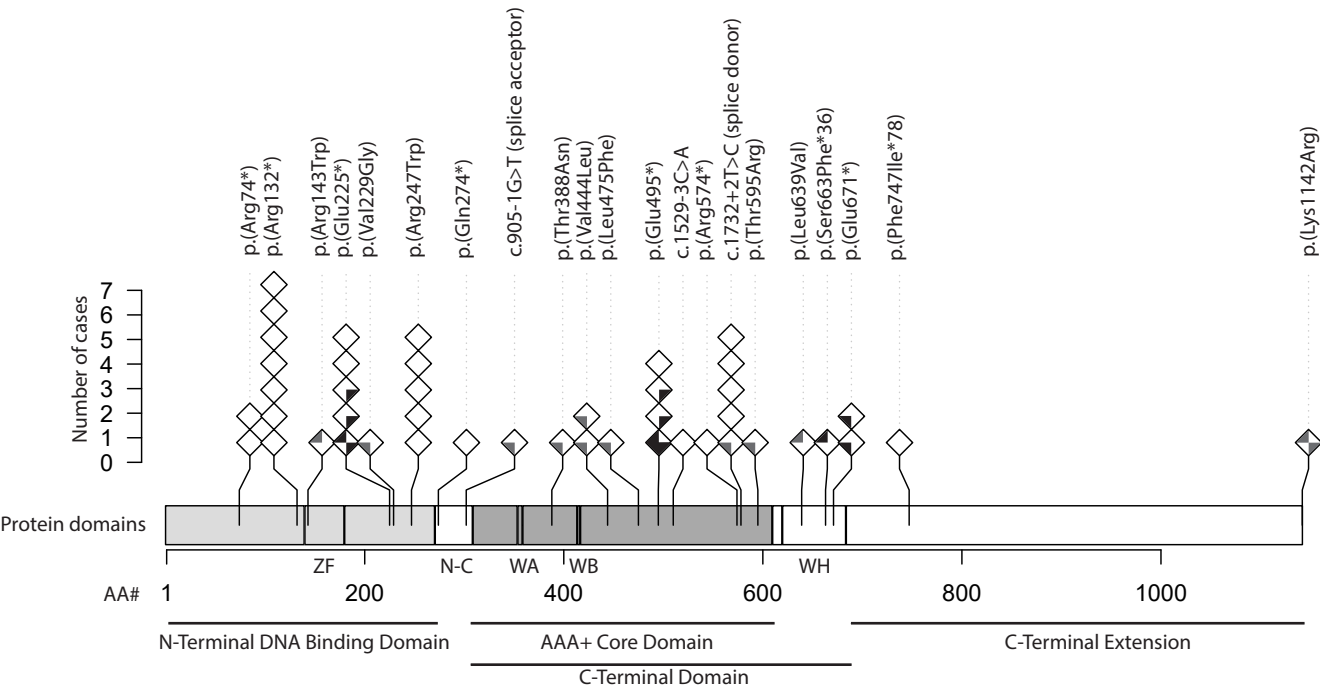

| Reported phenotype |              | ACMG/AMP |                                 |
|--------------------|--------------|----------|---------------------------------|
|                    | CRC          |          | Other type(s) of cancer         |
|                    | Hypogonadism |          | VUS                             |
|                    | Polyposis    |          | Pathogenic or likely pathogenic |
